# Supplementary material for: Proteogenomic analysis of the total and surface-exposed proteomes of Plasmodium vivax salivary gland sporozoites
Source: PLOS journal article supplement (doi:10.1371/journal.pntd.0005791), 2017-07-31
Supplement: S8 (10.1371/journal.pntd.0005791.s008) [file journal.pntd.0005791.s008]

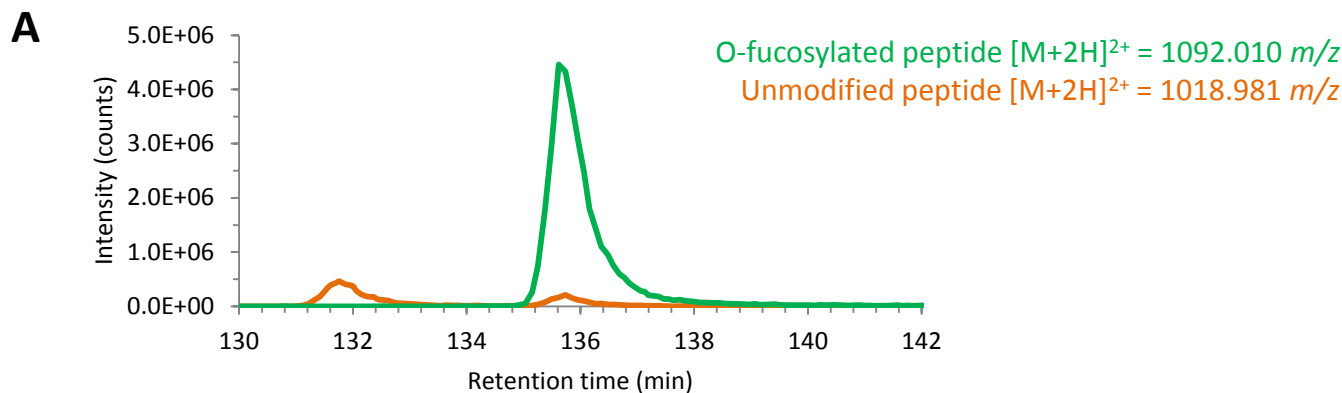

MS data file: V2P\_2013\_0201\_KES\_PvVK247\_sgSpz\_04\_B.raw Scan number 32572, RT = 132.16

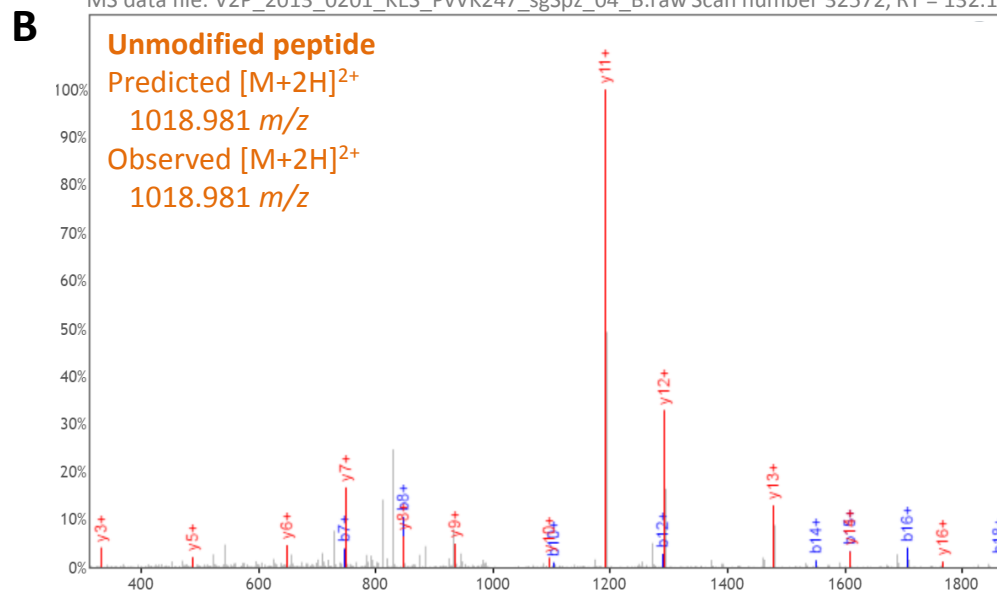

| b+        | #  | Seq | #  | y+        |
|-----------|----|-----|----|-----------|
| 72.0444   | 1  | A   | 19 |           |
| 173.0921  | 2  | T   | 18 | 1965.9157 |
| 272.1605  | 3  | V   | 17 | 1864.8680 |
| 329.1819  | 4  | G   | 16 | 1765.7996 |
| 430.2296  | 5  | T   | 15 | 1708.7782 |
| 559.2722  | 6  | E   | 14 | 1607.7305 |
| 745.3515  | 7  | W   | 13 | 1478.6879 |
| 846.3992  | 8  | T   | 12 | 1292.6086 |
| 943.4520  | 9  | P   | 11 | 1191.5609 |
| 1103.4826 | 10 | C   | 10 | 1094.5081 |
| 1190.5146 | 11 | S   | 9  | 934.4775  |
| 1289.5831 | 12 | V   | 8  | 847.4454  |
| 1390.6307 | 13 | T   | 7  | 748.3770  |
| 1550.6614 | 14 | C   | 6  | 647.3294  |
| 1607.6829 | 15 | G   | 5  | 487.2987  |
| 1706.7513 | 16 | V   | 4  | 430.2772  |
| 1763.7727 | 17 | G   | 3  | 331.2088  |
| 1862.8411 | 18 | V   | 2  | 274.1874  |
|           | 19 | R   | 1  | 175.1190  |

MS data file: V2P\_2013\_0201\_KES\_PvVK247\_sgSpz\_04\_B.raw Scan number 33541, RT = 135.97

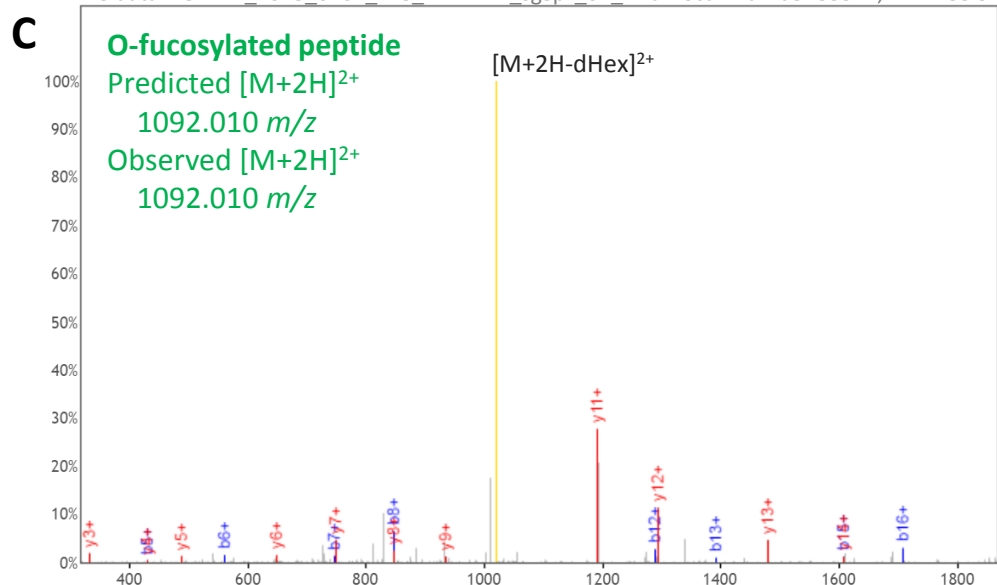

| b+        | #  | Seq | #  | y+        |
|-----------|----|-----|----|-----------|
| 72.0444   | 1  | A   | 19 |           |
| 173.0921  | 2  | T   | 18 | 1965.9157 |
| 272.1605  | 3  | V   | 17 | 1864.8680 |
| 329.1819  | 4  | G   | 16 | 1765.7996 |
| 430.2296  | 5  | T   | 15 | 1708.7782 |
| 559.2722  | 6  | E   | 14 | 1607.7305 |
| 745.3515  | 7  | W   | 13 | 1478.6879 |
| 846.3992  | 8  | T   | 12 | 1292.6086 |
| 943.4520  | 9  | P   | 11 | 1191.5609 |
| 1103.4826 | 10 | C   | 10 | 1094.5081 |
| 1190.5146 | 11 | S   | 9  | 934.4775  |
| 1289.5831 | 12 | V   | 8  | 847.4454  |
| 1390.6307 | 13 | T   | 7  | 748.3770  |
| 1550.6614 | 14 | C   | 6  | 647.3294  |
| 1607.6829 | 15 | G   | 5  | 487.2987  |
| 1706.7513 | 16 | V   | 4  | 430.2772  |
| 1763.7727 | 17 | G   | 3  | 331.2088  |
| 1862.8411 | 18 | V   | 2  | 274.1874  |
|           | 19 | R   | 1  | 175.1190  |

**S6 Fig. Evidence for glycosylation of CSP in *P. vivax* VK247 salivary gland sporozoites.** (A) Representative extracted ion chromatograms (XIC) of the doubly-charged ions of the CSP peptide ATVGEWTPCSTVCGVGVR from *P. vivax* VK247 salivary gland sporozoites. The largest chromatographic peak (green) was produced by a species with a mass matching the peptide plus a deoxyhexose, which we presume to be O-fucose. The unmodified peptide (orange) was observed co-eluting with the putatively-fucosylated species, consistent with loss of the gas-phase-labile modification due to collision-induced dissociation (CID) within the mass analyzer source, as well as eluting as a distinct peak at 131.8 min. These data suggest that the majority of CSP in the sample was modified with a single O-fucose, but that some unmodified CSP was also present. Representative collision-induced dissociation (CID) fragmentation spectra of the unmodified (B) and glycosylated (C) peptides confirmed the peptide sequence. CID of the peptide lacking O-fucose (B) provided confirmation of the assignments of the fragment spectra obtained from the O-fucosylated species (C). Fragment ions are annotated as b-ions (blue) and y-ions (red). The unfragmented peptide is designated M (yellow) with addition of protons (H) and neutral loss of deoxyhexose (dHex). Fucose is a deoxyhexose. Fragmentation spectra of the O-fucosylated peptide showed that the dominant product of CID fragmentation was the intact peptide that had lost the O-linked glycan. No peptide fragment spectra were observed with the O-fucose glycan intact, so the location of the glycan could not be confirmed, but based on the presence of the O-fucosylation motif, we presume that the Thr of CSVTG was modified.
