# Supplementary material for: Proteogenomic analysis of the total and surface-exposed proteomes of Plasmodium vivax salivary gland sporozoites
Source: PLoS Negl Trop Dis. 2017 Jul 31;11(7):e0005791. doi: 10.1371/journal.pntd.0005791 (PMC5552340; doi:10.1371/journal.pntd.0005791)
Supplement: S10 Table — (XLSX) [file pntd.0005791.s020.xlsx]

## Sheet: S10_Table
S10 Table. Identification of invasion proteins in salivary gland sporozoites. (a) Putative subcellular localization of proteins was compiled from curated data in PlasmoDB v30 (plasmodb.org; PMID: 18957442), ApiLoc version 3 (http://apiloc.biochem.unimelb.edu.au/apiloc/apiloc) , and literature review reported in Lindner & Swearingen et al. 2013 (PMID: 23325771). Designation of glideosome proteins …
Localizationa	PVP01 orthologb	Protein	Description	PF3D7 orthologb	Protein	Description	Syntenic orthologs?b	ID'd in P. vivax salivary gland sporozoites?	VK210 PSMc	VK247 PSMc	ID'd in P. falciparum salivary gland sporozoites?	P. falciparum PSMd
Dense Granule	PVP01_0917300	DPAP1	dipeptidyl aminopeptidase 1, putative	PF3D7_1116700	DPAP1	dipeptidyl aminopeptidase 1	YES	YES BOTH	273	445	YES	290
Dense Granule	PVP01_0504800	ETRAMP	early transcribed membrane protein	PF3D7_0829600	ETRAMP8	early transcribed membrane protein 8	YES	YES BOTH	2	1	YES	3
Dense Granule	PVP01_0937800	SUB2	subtilisin-like protease 2, putative	PF3D7_1136900	SUB2	subtilisin-like protease 2	YES	YES VK247	0	5	YES	6
Dense Granule	PVP01_0211400	-	conserved Plasmodium protein, unknown function	PF3D7_0103300	-	conserved Plasmodium protein, unknown function	YES	YES VK210	1	0	NO	NO
Dense Granule	#N/A	#N/A	#N/A	PF3D7_1016900	ETRAMP10.3	early transcribed membrane protein 10.3	#N/A	NO	0	0	YES	6
Dense Granule	PVP01_0623800	DBP	duffy binding protein	PF3D7_0424300	EBA165	erythrocyte binding antigen-165, pseudogene	NO	NO	0	0	NO	NO
Dense Granule	PVP01_0102300	DBP2	duffy binding protein 2	PF3D7_0424300	EBA165	erythrocyte binding antigen-165, pseudogene	NO	NO	0	0	NO	NO
Dense Granule	PVP01_1403100	ETRAMP	early transcribed membrane protein	PF3D7_1302200	ETRAMP13	early transcribed membrane protein 13	YES	NO	0	0	NO	NO
Dense Granule	PVP01_1026500	SUB1	subtilisin-like protease 1	PF3D7_0507500	SUB1	subtilisin-like protease 1	YES	NO	0	0	NO	NO
Dense Granule	#N/A	#N/A	#N/A	PF3D7_0102200	RESA	ring-infected erythrocyte surface antigen	#N/A	NO	0	0	NO	NO
Localizationa	PVP01 orthologb	Protein	Description	PF3D7 orthologb	Protein	Description	Syntenic orthologs?b	ID'd in P. vivax salivary gland sporozoites?	VK210 PSMc	VK247 PSMc	ID'd in P. falciparum salivary gland sporozoites?	P. falciparum PSMd
Microneme	PVP01_0613800	MTRAP	merozoite TRAP-like protein, putative	PF3D7_1028700	MTRAP	merozoite TRAP-like protein	YES	YES BOTH	4	19	NO	NO
Microneme	PVP01_1218700	TRAP	thrombospondin-related anonymous protein, putative	PF3D7_1335900	TRAP	thrombospondin-related anonymous protein	YES	YES BOTH	2744	2502	YES	2079
Microneme	PVP01_0835600	CSP	circumsporozoite (CS) protein	PF3D7_0304600	CSP	circumsporozoite (CS) protein	YES	YES BOTH	1228	1253	YES	1352
Microneme	PVP01_0934200	AMA1	apical membrane antigen 1	PF3D7_1133400	AMA1	apical membrane antigen 1	YES	YES BOTH	1039	1122	YES	1193
Microneme	PVP01_0505600	GAMA	GPI-anchored micronemal antigen, putative	PF3D7_0828800	GAMA	GPI-anchored micronemal antigen	YES	YES BOTH	801	1154	YES	619
Microneme	PVP01_0308000	PLP1	perforin-like protein 1	PF3D7_0408700	PLP1	perforin-like protein 1	YES	YES BOTH	740	1020	YES	996
Microneme	PVP01_1258000	GEST	gamete egress and sporozoite traversal protein, putative	PF3D7_1449000	GEST	gamete egress and sporozoite traversal protein, putative	YES	YES BOTH	619	816.998	YES	639.762
Microneme	PVP01_1412800	M1AAP	M1-family alanyl aminopeptidase, putative	PF3D7_1311800	M1AAP	M1-family alanyl aminopeptidase	YES	YES BOTH	340	327	YES	869
Microneme	PVP01_0506500	PDI8	protein disulfide isomerase, putative	PF3D7_0827900	PDI8	protein disulfide isomerase	YES	YES BOTH	278.431	356.997	YES	442.576
Microneme	PVP01_1435400	CelTOS	cell traversal protein for ookinetes and sporozoites	PF3D7_1216600	CelTOS	cell traversal protein for ookinetes and sporozoites	YES	YES BOTH	249	519	YES	137
Microneme	PVP01_1212300	SPECT1	sporozoite protein essential for cell traversal, putative	PF3D7_1342500	SPECT1	sporozoite protein essential for cell traversal	YES	YES BOTH	294	481.953	YES	230
Microneme	PVP01_0916600	RON4	rhoptry neck protein 4	PF3D7_1116000	RON4	rhoptry neck protein 4	YES	YES BOTH	220	204	YES	330
Microneme	PVP01_0710400	ICP	inhibitor of cysteine proteases, putative	PF3D7_0911900	ICP	falstatin	YES	YES BOTH	194	231	YES	66
Microneme	PVP01_0937400	CK1	casein kinase 1, putative	PF3D7_1136500	CK1	casein kinase 1	YES	YES BOTH	162.407	190	YES	223
Microneme	PVP01_1026000	P38	6-cysteine protein	PF3D7_0508000	P38	6-cysteine protein	YES	YES BOTH	118	110	YES	232
Microneme	PVP01_0948400	MAEBL	membrane associated erythrocyte binding-like protein, putative	PF3D7_1147800	MAEBL	membrane associated erythrocyte binding-like protein	YES	YES BOTH	90	93	YES	153
Microneme	PVP01_0418900	PAT	pantothenate transporter, putative	PF3D7_0206200	PAT	pantothenate transporter	YES	YES BOTH	92	97	YES	123
Microneme	PVP01_0911200	-	asparagine-rich antigen, putative	PF3D7_1110400	-	asparagine-rich antigen	YES	YES BOTH	86	216	YES	131
Microneme	PVP01_1436800	TRAMP	thrombospondin-related apical membrane protein, putative	PF3D7_1218000	TRAMP	thrombospondin-related apical membrane protein	YES	YES BOTH	67	130	YES	51
Microneme	PVP01_0305300	RON1	rhoptry neck protein 1	PF3D7_0405900	ASP	apical sushi protein	YES	YES BOTH	59	67	YES	226
Microneme	PVP01_0412300	SPATR	secreted protein with altered thrombospondin repeat domain, putative	PF3D7_0212600	SPATR	secreted protein with altered thrombospondin repeat domain	YES	YES BOTH	51	100	YES	57
Microneme	PVP01_0615300	CLAMP	claudin-like apicomplexan microneme protein, putative	PF3D7_1030200	CLAMP	claudin-like apicomplexan microneme protein, putative	YES	YES BOTH	25	60	YES	47
Microneme	PVP01_0521100	-	conserved Apicomplexan protein, unknown function	PF3D7_0414600	-	conserved Apicomplexan protein, unknown function	YES	YES BOTH	27	36	YES	31
Microneme	PVP01_1249900	SPP	signal peptide peptidase, putative	PF3D7_1457000	SPP	signal peptide peptidase	YES	YES BOTH	13	12	YES	89
Microneme	PVP01_0914900	ROM1	rhomboid protease ROM1, putative	PF3D7_1114100	ROM1	rhomboid protease ROM1	YES	YES BOTH	12	16	YES	46
Microneme	PVP01_0913900	PRL	protein tyrosine phosphatase, putative	PF3D7_1113100	PRL	protein tyrosine phosphatase	YES	YES BOTH	7	6	YES	8
Microneme	PVP01_1209500	-	conserved Plasmodium protein, unknown function	PF3D7_1345300	-	conserved Plasmodium protein, unknown function	YES	YES VK210	6	0	YES	10
Microneme	PVP01_0511600	-	conserved Plasmodium protein, unknown function	PF3D7_0822700	-	conserved Plasmodium protein, unknown function	YES	YES VK210	6	0	YES	10
Microneme	PVP01_0937800	SUB2	subtilisin-like protease 2, putative	PF3D7_1136900	SUB2	subtilisin-like protease 2	YES	YES VK247	0	5	YES	6
Microneme	PVP01_0412000	-	leucyl/phenylalanyl-tRNA--protein transferase, putative	PF3D7_0212900	-	leucyl/phenylalanyl-tRNA--protein transferase, putative	YES	YES VK247	0	1	YES	8
Microneme	PVP01_0728900	MSP1	merozoite surface protein 1	PF3D7_0930300	MSP1	merozoite surface protein 1	YES	NO	0	0	YES	10
Microneme	PVP01_0418400	MSP5	merozoite surface protein 5	PF3D7_0206900	MSP5	merozoite surface protein 5	YES	NO	0	0	YES	6
Microneme	PVP01_0319800	-	conserved Plasmodium protein, unknown function	PF3D7_0724100	-	conserved Plasmodium protein, unknown function	YES	NO	0	0	YES	8
Microneme	PVP01_0800900	-	cytoadherence-linked asexual protein (CLAG), putative	PF3D7_0302200	CLAG3.2	cytoadherence linked asexual protein 3.2	NO	NO	0	0	YES	3
Microneme	PVP01_1401400	-	cytoadherence linked asexual protein, CLAG, putative	PF3D7_0302200	CLAG3.2	cytoadherence linked asexual protein 3.2	NO	NO	0	0	YES	3
Microneme	PVP01_0734500	CLAG7	cytoadherence linked asexual protein 7	PF3D7_0302200	CLAG3.2	cytoadherence linked asexual protein 3.2	NO	NO	0	0	YES	3
Microneme	PVP01_0623800	DBP	duffy binding protein	PF3D7_1301600	EBA140	erythrocyte binding antigen-140	NO	NO	0	0	NO	NO
Microneme	PVP01_0623800	DBP	duffy binding protein	PF3D7_0424300	EBA165	erythrocyte binding antigen-165, pseudogene	NO	NO	0	0	NO	NO
Microneme	PVP01_0623800	DBP	duffy binding protein	PF3D7_0731500	EBA175	erythrocyte binding antigen-175	NO	NO	0	0	NO	0
Microneme	PVP01_0623800	DBP	duffy binding protein	PF3D7_0102500	EBA181	erythrocyte binding antigen-181	NO	NO	0	0	NO	NO
Microneme	PVP01_0623800	DBP	duffy binding protein	PF3D7_1371600	EBL1	erythrocyte binding like protein 1, pseudogene	NO	NO	0	0	NO	NO
Microneme	PVP01_0102300	DBP2	duffy binding protein 2	PF3D7_0731500	EBA175	erythrocyte binding antigen-175	NO	NO	0	0	NO	0
Microneme	PVP01_0102300	DBP2	duffy binding protein 2	PF3D7_1301600	EBA140	erythrocyte binding antigen-140	NO	NO	0	0	NO	NO
Microneme	PVP01_0102300	DBP2	duffy binding protein 2	PF3D7_0424300	EBA165	erythrocyte binding antigen-165, pseudogene	NO	NO	0	0	NO	NO
Microneme	PVP01_0102300	DBP2	duffy binding protein 2	PF3D7_0102500	EBA181	erythrocyte binding antigen-181	NO	NO	0	0	NO	NO
Microneme	PVP01_0102800	CHT1	chitinase	PF3D7_1252200	CHT1	chitinase	NO	NO	0	0	NO	NO
Microneme	PVP01_0824900	CTRP	circumsporozoite- and TRAP-related protein, putative	PF3D7_0315200	CTRP	circumsporozoite- and TRAP-related protein	YES	NO	0	0	NO	NO
Microneme	PVP01_0532400	CyRPA	cysteine-rich protective antigen, putative	PF3D7_0423800	CyRPA	cysteine-rich protective antigen	NO	NO	0	0	NO	NO
Microneme	PVP01_0824100	MA	microneme associated antigen, putative	PF3D7_0316000	MA	microneme associated antigen	YES	NO	0	0	NO	NO
Microneme	PVP01_0604000	-	conserved protein, unknown function	PF3D7_1018800	-	conserved protein, unknown function	YES	NO	0	0	NO	NO
Microneme	PVP01_0721800	PLP3	perforin-like protein 3	PF3D7_0923300	PLP3	perforin-like protein 3	YES	NO	0	0	NO	NO
Microneme	PVP01_1214800	PSOP7	secreted ookinete protein, putative	PF3D7_1340000	PSOP7	secreted ookinete protein, putative	YES	NO	0	0	NO	NO
Microneme	PVP01_0701200	RBP1a	reticulocyte binding protein 1a	PF3D7_1335400	RH2a	reticulocyte binding protein 2 homologue a	NO	NO	0	0	NO	NO
Microneme	PVP01_0701200	RBP1a	reticulocyte binding protein 1a	PF3D7_1335300	RH2b	reticulocyte binding protein 2 homologue b	NO	NO	0	0	NO	NO
Microneme	PVP01_0701200	RBP1a	reticulocyte binding protein 1a	PF3D7_1252400	RH3	reticulocyte binding protein homologue 3, pseudogene	NO	NO	0	0	NO	NO
Microneme	PVP01_0701100	RBP1b	reticulocyte binding protein 1b	PF3D7_1335400	RH2a	reticulocyte binding protein 2 homologue a	NO	NO	0	0	NO	NO
Microneme	PVP01_0701100	RBP1b	reticulocyte binding protein 1b	PF3D7_1335300	RH2b	reticulocyte binding protein 2 homologue b	NO	NO	0	0	NO	NO
Microneme	PVP01_0701100	RBP1b	reticulocyte binding protein 1b	PF3D7_1252400	RH3	reticulocyte binding protein homologue 3, pseudogene	NO	NO	0	0	NO	NO
Microneme	PVP01_1469400	RBP3	reticulocyte binding protein 3, pseudogene	#N/A	#N/A	#N/A	NO	NO	0	0	NO	NO
Microneme	PVP01_0816800	RIPR	Rh5 interacting protein, putative	PF3D7_0323400	RIPR	Rh5 interacting protein	YES	NO	0	0	NO	NO
Microneme	PVP01_1344500	SOAP	secreted ookinete adhesive protein, putative	PF3D7_1404300	SOAP	secreted ookinete adhesive protein, putative	YES	NO	0	0	NO	NO
Microneme	PVP01_0118900	WARP	von Willebrand factor A domain-related protein, putative	PF3D7_0801300	WARP	von Willebrand factor A domain-related protein	YES	NO	0	0	NO	NO
Microneme	#N/A	#N/A	#N/A	PF3D7_1036000	MSP11	merozoite surface protein	#N/A	NO	0	0	NO	NO
Localizationa	PVP01 orthologb	Protein	Description	PF3D7 orthologb	Protein	Description	Syntenic orthologs?b	ID'd in P. vivax salivary gland sporozoites?	VK210 PSMc	VK247 PSMc	ID'd in P. falciparum salivary gland sporozoites?	P. falciparum PSMd
Rhoptry	PVP01_0934200	AMA1	apical membrane antigen 1	PF3D7_1133400	AMA1	apical membrane antigen 1	YES	YES BOTH	1039	1122	YES	1193
Rhoptry	PVP01_1110200	GAC	glideosome-associated connector, putative	PF3D7_1361800	GAC	glideosome-associated connector	YES	YES BOTH	778	1747	YES	1778
Rhoptry	PVP01_1469200	RON3	rhoptry neck protein 3, putative	PF3D7_1252100	RON3	rhoptry neck protein 3	YES	YES BOTH	335	491	YES	737
Rhoptry	PVP01_1022200	INO1	inositol-3-phosphate synthase, putative	PF3D7_0511800	INO1	inositol-3-phosphate synthase	YES	YES BOTH	277.343	433	YES	315.99
Rhoptry	PVP01_0812500	HGPRT	hypoxanthine-guanine phosphoribosyltransferase, putative	PF3D7_1012400	HGPRT	hypoxanthine-guanine phosphoribosyltransferase	YES	YES BOTH	211	199	YES	188
Rhoptry	PVP01_1421400	RAB11a	ras-related protein Rab-11A, putative	PF3D7_1320600	RAB11a	ras-related protein Rab-11A	YES	YES BOTH	155.571	179.077	YES	99.3695
Rhoptry	PVP01_1426100	ALBA1	DNA/RNA-binding protein Alba 1, putative	PF3D7_0814200	ALBA1	DNA/RNA-binding protein Alba 1	YES	YES BOTH	124	188	YES	149
Rhoptry	PVP01_1207300	ALBA4	DNA/RNA-binding protein Alba 4, putative	PF3D7_1347500	ALBA4	DNA/RNA-binding protein Alba 4	YES	YES BOTH	124	177	YES	279
Rhoptry	PVP01_1420800	PRP2	golgi protein 1, putative	PF3D7_1320000	GP1	golgi protein 1	YES	YES BOTH	116	127	YES	44
Rhoptry	PVP01_0948400	MAEBL	membrane associated erythrocyte binding-like protein, putative	PF3D7_1147800	MAEBL	membrane associated erythrocyte binding-like protein	YES	YES BOTH	90	93	YES	153
Rhoptry	PVP01_0107500	RAMA	rhoptry-associated membrane antigen, putative	PF3D7_0707300	RAMA	rhoptry-associated membrane antigen	YES	YES BOTH	95	28	YES	109
Rhoptry	PVP01_1128300	PDX1	pyridoxine biosynthesis protein PDX1, putative	PF3D7_0621200	PDX1	pyridoxine biosynthesis protein PDX1	YES	YES BOTH	84	87	YES	65
Rhoptry	PVP01_1135800	ROP14	rhoptry protein ROP14, putative	PF3D7_0613300	ROP14	rhoptry protein ROP14	YES	YES BOTH	73	123	YES	269
Rhoptry	PVP01_1436800	TRAMP	thrombospondin-related apical membrane protein, putative	PF3D7_1218000	TRAMP	thrombospondin-related apical membrane protein	YES	YES BOTH	67	130	YES	51
Rhoptry	PVP01_0412300	SPATR	secreted protein with altered thrombospondin repeat domain, putative	PF3D7_0212600	SPATR	secreted protein with altered thrombospondin repeat domain	YES	YES BOTH	51	100	YES	57
Rhoptry	PVP01_0805900	ALBA3	DNA/RNA-binding protein Alba 3, putative	PF3D7_1006200	ALBA3	DNA/RNA-binding protein Alba 3	YES	YES BOTH	38	89	YES	106
Rhoptry	PVP01_1020100	RAB1a	ras-related protein Rab-1A, putative	PF3D7_0513800	RAB1a	ras-related protein Rab-1A	YES	YES BOTH	38.2347	19.2954	YES	26.0611
Rhoptry	PVP01_0812300	RA	rhoptry associated adhesin, putative	PF3D7_1012200	RA	rhoptry associated adhesin	YES	YES BOTH	28	33	YES	29
Rhoptry	PVP01_0521400	ARO	armadillo-domain containing rhoptry protein, putative	PF3D7_0414900	ARO	armadillo-domain containing rhoptry protein	YES	YES BOTH	22	44	YES	12
Rhoptry	PVP01_1013100	-	conserved Plasmodium protein, unknown function	PF3D7_0520800	-	conserved Plasmodium protein, unknown function	YES	YES BOTH	19	54	YES	1
Rhoptry	PVP01_0731000	M18AAP	M18 aspartyl aminopeptidase, putative	PF3D7_0932300	M18AAP	M18 aspartyl aminopeptidase	YES	YES BOTH	18	16	YES	99
Rhoptry	PVP01_0529100	Pv34	apical merozoite protein	PF3D7_0419700	Pf34	apical merozoite protein	YES	YES BOTH	20	17	YES	83
Rhoptry	PVP01_0913900	PRL	protein tyrosine phosphatase, putative	PF3D7_1113100	PRL	protein tyrosine phosphatase	YES	YES BOTH	7	6	YES	8
Rhoptry	PVP01_0422100	ROPE	repetitive organellar protein, putative	PF3D7_0203000	ROPE	repetitive organellar protein, putative	YES	YES BOTH	6	39	YES	15
Rhoptry	PVP01_1412400	AP1M1	AP-1 complex subunit mu-1, putative	PF3D7_1311400	AP1M1	AP-1 complex subunit mu-1	YES	YES BOTH	3	8	YES	5
Rhoptry	PVP01_0727900	RhopH2	high molecular weight rhoptry protein 2	PF3D7_0929400	RhopH2	high molecular weight rhoptry protein 2	YES	YES BOTH	3	7	YES	13
Rhoptry	PVP01_1005400	DHHC7	palmitoyltransferase DHHC7, putative	PF3D7_0528400	DHHC7	palmitoyltransferase DHHC7	YES	YES BOTH	2	5	YES	2
Rhoptry	PVP01_0703800	RhopH3	high molecular weight rhoptry protein 3	PF3D7_0905400	RhopH3	high molecular weight rhoptry protein 3	YES	YES VK247	0	3	YES	22
Rhoptry	PVP01_1338500	RAP1	rhoptry-associated protein 1	PF3D7_1410400	RAP1	rhoptry-associated protein 1	YES	YES VK210	4	0	YES	5
Rhoptry	PVP01_0408300	ATG11	autophagy-related protein 11, putative	PF3D7_0203000	ROPE	repetitive organellar protein, putative	YES	NO	0	0	YES	15
Rhoptry	PVP01_1033400	RAP2	rhoptry-associated protein 2	PF3D7_0501600	RAP2	rhoptry-associated protein 2	NO	NO	0	0	YES	3
Rhoptry	PVP01_1033400	RAP2	rhoptry-associated protein 2	PF3D7_0501500	RAP3	rhoptry-associated protein 3	NO	NO	0	0	NO	NO
Rhoptry	PVP01_0800900	-	cytoadherence-linked asexual protein (CLAG), putative	PF3D7_0302200	CLAG3.2	cytoadherence linked asexual protein 3.2	NO	NO	0	0	YES	3
Rhoptry	PVP01_0734500	CLAG7	cytoadherence linked asexual protein 7	PF3D7_0302200	CLAG3.2	cytoadherence linked asexual protein 3.2	NO	NO	0	0	YES	3
Rhoptry	PVP01_1401400	-	cytoadherence linked asexual protein, CLAG, putative	PF3D7_0302200	CLAG3.2	cytoadherence linked asexual protein 3.2	NO	NO	0	0	YES	3
Rhoptry	PVP01_0734500	CLAG7	cytoadherence linked asexual protein 7	PF3D7_0302500	CLAG3.1	cytoadherence linked asexual protein 3.1	NO	NO	0	0	NO	NO
Rhoptry	PVP01_1401400	-	cytoadherence linked asexual protein, CLAG, putative	PF3D7_0302500	CLAG3.1	cytoadherence linked asexual protein 3.1	NO	NO	0	0	NO	NO
Rhoptry	PVP01_0800900	-	cytoadherence-linked asexual protein (CLAG), putative	PF3D7_0302500	CLAG3.1	cytoadherence linked asexual protein 3.1	NO	NO	0	0	NO	NO
Rhoptry	PVP01_0734500	CLAG7	cytoadherence linked asexual protein 7	PF3D7_0220800	CLAG2	cytoadherence linked asexual protein 2	NO	NO	0	0	NO	NO
Rhoptry	PVP01_1401400	-	cytoadherence linked asexual protein, CLAG, putative	PF3D7_0220800	CLAG2	cytoadherence linked asexual protein 2	NO	NO	0	0	NO	NO
Rhoptry	PVP01_0800900	-	cytoadherence-linked asexual protein (CLAG), putative	PF3D7_0220800	CLAG2	cytoadherence linked asexual protein 2	NO	NO	0	0	NO	NO
Rhoptry	PVP01_0734500	CLAG7	cytoadherence linked asexual protein 7	PF3D7_0831600	CLAG8	cytoadherence linked asexual protein 8	NO	NO	0	0	NO	NO
Rhoptry	PVP01_1401400	-	cytoadherence linked asexual protein, CLAG, putative	PF3D7_0831600	CLAG8	cytoadherence linked asexual protein 8	NO	NO	0	0	NO	NO
Rhoptry	PVP01_0800900	-	cytoadherence-linked asexual protein (CLAG), putative	PF3D7_0831600	CLAG8	cytoadherence linked asexual protein 8	NO	NO	0	0	NO	NO
Rhoptry	PVP01_0734500	CLAG7	cytoadherence linked asexual protein 7	PF3D7_0935800	CLAG9	cytoadherence linked asexual protein 9	YES	NO	0	0	NO	NO
Rhoptry	PVP01_1129100	MSP10	merozoite surface protein 10, putative	PF3D7_0620400	MSP10	merozoite surface protein 10	YES	NO	0	0	NO	NO
Rhoptry	PVP01_1136400	P12	6-cysteine protein	PF3D7_0612700	P12	6-cysteine protein	YES	NO	0	0	NO	NO
Rhoptry	#N/A	#N/A	#N/A	PF3D7_0402300	RH1	reticulocyte binding protein homologue 1	#N/A	NO	0	0	NO	NO
Rhoptry	#N/A	#N/A	#N/A	PF3D7_0424200	RH4	reticulocyte binding protein homologue 4	#N/A	NO	0	0	NO	NO
Rhoptry	#N/A	#N/A	#N/A	PF3D7_0424100	RH5	reticulocyte binding protein homologue 5	#N/A	NO	0	0	NO	NO
Rhoptry	PVP01_1105600	RHOP148	rhoptry protein RHOP148, putative	PF3D7_1366400	RHOP148	rhoptry protein RHOP148	YES	NO	0	0	NO	NO
Rhoptry	PVP01_0704500	RNaseII	exoribonuclease II, putative	PF3D7_0906000	RNaseII	exoribonuclease II	YES	NO	0	0	NO	NO
Localizationa	PVP01 orthologb	Protein	Description	PF3D7 orthologb	Protein	Description	Syntenic orthologs?b	ID'd in P. vivax salivary gland sporozoites?	VK210 PSMc	VK247 PSMc	ID'd in P. falciparum salivary gland sporozoites?	P. falciparum PSMd
Rhoptry Neck	PVP01_0410000	RON6	rhoptry neck protein 6, putative	PF3D7_0214900	RON6	rhoptry neck protein 6	YES	YES BOTH	64	58	YES	224
Rhoptry Neck	PVP01_0305300	RON1	rhoptry neck protein 1	PF3D7_0405900	ASP	apical sushi protein	YES	YES BOTH	59	67	YES	226
Rhoptry Neck	PVP01_0317900	RALP1	rhoptry-associated leucine zipper-like protein 1	PF3D7_0722200	RALP1	rhoptry-associated leucine zipper-like protein 1	YES	YES BOTH	82	115	YES	159
Rhoptry Neck	PVP01_0916600	RON4	rhoptry neck protein 4	PF3D7_1116000	RON4	rhoptry neck protein 4	YES	YES BOTH	220	204	YES	330
Rhoptry Neck	PVP01_0602300	RON12	rhoptry neck protein 12, putative	PF3D7_1017100	RON12	rhoptry neck protein 12	YES	YES BOTH	146	214	YES	101
Rhoptry Neck	PVP01_0517600	RON5	rhoptry neck protein 5	PF3D7_0817700	RON5	rhoptry neck protein 5	YES	YES BOTH	360	312	YES	468.956
Rhoptry Neck	PVP01_1255000	RON2	rhoptry neck protein 2	PF3D7_1452000	RON2	rhoptry neck protein 2	YES	YES BOTH	321	626	YES	500
Rhoptry Neck	PVP01_1022400	ARNP	apical rhoptry neck protein, putative	PF3D7_0511600	ARNP	apical rhoptry neck protein	YES	NO	0	0	YES	6
Rhoptry Neck	PVP01_0531900	ARP	asparagine-rich protein	PF3D7_0423400	AARP	apical asparagine-rich protein AARP	YES	NO	0	0	NO	NO
Rhoptry Neck	PVP01_0800700	RBP2b	reticulocyte binding protein 2b	PF3D7_1335300	RH2b	reticulocyte binding protein 2 homologue b	NO	NO	0	0	NO	NO
Rhoptry Neck	PVP01_1402400	RBP2a	reticulocyte binding protein 2a	PF3D7_1335400	RH2a	reticulocyte binding protein 2 homologue a	NO	NO	0	0	NO	NO
Localizationa	PVP01 orthologb	Protein	Description	PF3D7 orthologb	Protein	Description	Syntenic orthologs?b	ID'd in P. vivax salivary gland sporozoites?	VK210 PSMc	VK247 PSMc	ID'd in P. falciparum salivary gland sporozoites?	P. falciparum PSMd
Glideosome	PVP01_1218700	TRAP	thrombospondin-related anonymous protein, putative	PF3D7_1335900	TRAP	thrombospondin-related anonymous protein	YES	YES BOTH	2744	2502	YES	2079
Glideosome	PVP01_0835600	CSP	circumsporozoite (CS) protein	PF3D7_0304600	CSP	circumsporozoite (CS) protein	YES	YES BOTH	1228	1253	YES	1352
Glideosome	PVP01_1463200	-	actin	PF3D7_1246200	ACT1	actin I	YES	YES BOTH	1113.34	1287.15	YES	1010.32
Glideosome	PVP01_0808400	-	tubulin beta chain, putative	PF3D7_1008700	-	tubulin beta chain	YES	YES BOTH	1576.08	1660.98	YES	2285.14
Glideosome	PVP01_0702100	-	alpha tubulin 1, putative	PF3D7_0903700	-	alpha tubulin 1	YES	YES BOTH	798.772	670.718	YES	1063.42
Glideosome	PVP01_0836200	IMC1a	inner membrane complex protein 1a, putative	PF3D7_0304000	IMC1a	inner membrane complex protein 1a, putative	YES	YES BOTH	1029	1007	YES	1050
Glideosome	PVP01_1212200	MyoA	myosin A, putative	PF3D7_1342600	MyoA	myosin A	YES	YES BOTH	997.985	1160	YES	1711
Glideosome	PVP01_0530800	-	alpha tubulin 2, putative	PF3D7_0422300	-	alpha tubulin 2	YES	YES BOTH	296.9	315.282	YES	307.612
Glideosome	PVP01_1262200	-	fructose 1,6-bisphosphate aldolase, putative	PF3D7_1444800	FBPA	fructose-bisphosphate aldolase	YES	YES BOTH	514.465	696	YES	574.438
Glideosome	PVP01_1008000	IMC1g	inner membrane complex protein 1g, putative	PF3D7_0525800	IMC1g	inner membrane complex protein 1g, putative	YES	YES BOTH	487	466	YES	322.101
Glideosome	PVP01_1128100	ALV7	inner membrane complex protein 1j, putative	PF3D7_0621400	ALV7	Pf77 protein	YES	YES BOTH	366.986	298	YES	348
Glideosome	PVP01_0836100	IMC1e	inner membrane complex protein 1e, putative	PF3D7_0304100	IMC1e	inner membrane complex protein 1e, putative	YES	YES BOTH	341	167	YES	447.922
Glideosome	PVP01_1336400	-	actin II	PF3D7_1412500	ACT2	actin II	YES	YES BOTH	88.0306	86.5225	YES	96.8752
Glideosome	PVP01_0716400	GAP50	glideosome-associated protein 50, putative	PF3D7_0918000	GAP50	glideosome-associated protein 50	YES	YES BOTH	343	562	YES	580
Glideosome	PVP01_1439700	IMC1h	inner membrane complex protein 1h, putative	PF3D7_1221400	IMC1h	inner membrane complex protein 1h, putative	YES	YES BOTH	356	256	YES	572
Glideosome	PVP01_1341900	GAPM3	glideosome associated protein with multiple membrane spans 3, putative	PF3D7_1406800	GAPM3	glideosome associated protein with multiple membrane spans 3	YES	YES BOTH	321	332	YES	343
Glideosome	PVP01_0803400	IMC1c	inner membrane complex protein 1c, putative	PF3D7_1003600	IMC1c	inner membrane complex protein 1c, putative	YES	YES BOTH	315	396	YES	302.977
Glideosome	PVP01_1132600	TLP	TRAP-like protein, putative	PF3D7_0616500	TLP	TRAP-like protein	YES	YES BOTH	288	596	YES	79
Glideosome	PVP01_0532000	GAPM2	glideosome associated protein with multiple membrane spans 2, putative	PF3D7_0423500	GAPM2	glideosome associated protein with multiple membrane spans 2	YES	YES BOTH	229	228	YES	416
Glideosome	PVP01_1213000	IMC1k	inner membrane complex protein 1k, putative	PF3D7_1341800	IMC1k	inner membrane complex protein 1k, putative	YES	YES BOTH	186	173	YES	257
Glideosome	PVP01_1230900	GAPM1	glideosome associated protein with multiple membrane spans 1, putative	PF3D7_1323700	GAPM1	glideosome associated protein with multiple membrane spans 1	YES	YES BOTH	216	187	YES	417
Glideosome	PVP01_1440900	GAP45	glideosome-associated protein 45, putative	PF3D7_1222700	GAP45	glideosome-associated protein 45	YES	YES BOTH	153	145	YES	239
Glideosome	PVP01_1463500	MTIP	myosin A tail domain interacting protein, putative	PF3D7_1246400	MTIP	myosin A tail domain interacting protein	YES	YES BOTH	174	144	YES	170
Glideosome	PVP01_1468300	-	coronin, putative	PF3D7_1251200	-	coronin	YES	YES BOTH	155	156	YES	191
Glideosome	PVP01_1030500	ADF1	actin-depolymerizing factor 1, putative	PF3D7_0503400	ADF1	actin-depolymerizing factor 1	YES	YES BOTH	154	528	YES	504
Glideosome	PVP01_0730900	PFN	profilin, putative	PF3D7_0932200	PFN	profilin, putative	YES	YES BOTH	158	271	YES	128
Glideosome	PVP01_0606800	-	deoxyribose-phosphate aldolase, putative	PF3D7_1021600	-	deoxyribose-phosphate aldolase, putative	YES	YES BOTH	93	162	YES	109
Glideosome	PVP01_1246200	ISP3	inner membrane complex sub-compartment protein 3, putative	PF3D7_1460600	ISP3	inner membrane complex sub-compartment protein 3	YES	YES BOTH	72	244	YES	201
Glideosome	PVP01_1203100	IMC1f	inner membrane complex protein 1f, putative	PF3D7_1351700	IMC1f	inner membrane complex protein 1f, putative	YES	YES BOTH	40	40	YES	80
Glideosome	PVP01_1126400	NAB2	nuclear polyadenylated RNA-binding protein NAB2, putative	PF3D7_0623100	NAB2	nuclear polyadenylated RNA-binding protein NAB2, putative	YES	YES BOTH	30	47	YES	26
Glideosome	PVP01_0209500	C-CAP	cyclase-associated protein, putative	PF3D7_0105300	CAP	cyclase-associated protein	YES	YES BOTH	16	13	YES	25
Glideosome	PVP01_1264400	TREP	TRAP-like protein	PF3D7_1442600	TREP	TRAP-like protein	NO	YES BOTH	14	47	YES	59
Glideosome	PVP01_1209200	-	inner membrane complex protein, putative	PF3D7_1345600	-	inner membrane complex protein	YES	YES BOTH	7	18	YES	32
Glideosome	PVP01_1016400	CPbeta	F-actin-capping protein subunit beta, putative	PF3D7_0517600	CPbeta	F-actin-capping protein subunit beta, putative	YES	YES BOTH	5	25	YES	3
Glideosome	PVP01_1005300	CPalpha	F-actin-capping protein subunit alpha, putative	PF3D7_0528500	CPalpha	F-actin-capping protein subunit alpha, putative	YES	YES BOTH	2	8	YES	2
Glideosome	PVP01_1011300	-	inner membrane complex protein, putative	PF3D7_0522600	-	inner membrane complex protein	YES	YES BOTH	1	7	YES	15
Glideosome	PVP01_1110600	ADF2	actin-depolymerizing factor 2, putative	PF3D7_1361400	ADF2	actin-depolymerizing factor 2	YES	NO	0	0	YES	1
Glideosome	PVP01_1002900	-	formin 1, putative	PF3D7_0530900	-	formin 1	YES	NO	0	0	YES	4
Glideosome	PVP01_1437800	-	formin 2, putative	PF3D7_1219000	-	formin 2	YES	NO	0	0	YES	24
Glideosome	PVP01_0108900	IMC1d	inner membrane complex protein 1d, putative	PF3D7_0708600	IMC1d	inner membrane complex protein 1d, putative	YES	NO	0	0	NO	0
Glideosome	PVP01_0116500	g-tub	tubulin gamma chain, putative	PF3D7_0803700	g-tub	tubulin gamma chain	YES	NO	0	0	NO	0
Glideosome	PVP01_0732500	-	delta tubulin, putative	PF3D7_0933800	-	delta tubulin, putative	YES	NO	0	0	NO	0
Glideosome	PVP01_0942600	IMC1b	inner membrane complex protein 1b, putative	PF3D7_1141900	IMC1b	inner membrane complex protein 1b, putative	YES	NO	0	0	NO	0
